# Supplementary material for: Remote clinical decision support tool for Parkinson's disease assessment using a novel approach that combines AI and clinical knowledge
Source: Research Square preprint supplement (doi:10.21203/rs.3.rs-5147639/v1), 2024-11-25
Supplement: Supplementary file 1 [file 3bb4d7953777a49a1b03d41a.docx]

**Tables**

| **Table 1: Participants characteristics** | | | | | | | |
| --- | --- | --- | --- | --- | --- | --- | --- |
|  | **PD (n=67)** | | | **HC (n=52)** | | **PD/HC p-value** | |
| **Gender (F/M)** | 30/37 | | | 28/24 | | 0.326 | |
| **Age (years)** | 66.5±7.7 | | | 65.8±9.2 | | 0.682 | |
| **MOCA** | 25.7±2.8 | | | 26.9±2.5 | | 0.126 | |
| **MDS- UPDRS** | 22.9±13.9 | | | 1.6±2.3 | | <0.001 | |
| **Disease duration (years)** | 4.8±3.9 | | | na | | na | |
| **LEDD (mg)** | 423.1±420.3 | | | na | | na | |
| PD=Parkinson’s disease, HC=healthy controls, MOCA=Montreal cognitive assessment, MDS-UPDRS =unified Parkinson’s disease rating scale. The values represent mean ± standard deviation. | | | | | | | |
| **Table 2:** Number of PD patients in each group according to different MDS-UPDRS parts | | | | | | | | |
| **MDS-UPDRS** | | “slight” (n) | “mild” (n) | | “moderate” (n) | | “severe” (n) | |
| **MDS-UPDRS tota**l | | 58 | 9 | | 0 | | 0 | |
| **MDS-UPDRS motor total** | | 56 | 11 | | 0 | | 0 | |
| **MDS-UPDRS facial (item 3.2)** | | 49 | 18 | | 0 | | 0 | |
| MDS-UPDRS=Movement Disorder Society-Unified Parkinson’s Disease Rating Scale, n=number of patients. | | | | | | | | |
