# Supplementary material for: Remote clinical decision support tool for Parkinson's disease assessment using a novel approach that combines AI and clinical knowledge
Source: Research Square preprint supplement (doi:10.21203/rs.3.rs-5147639/v1), 2024-11-25
Supplement: Supplementary file 2 [file adcb9e00abee6656bb5656b9.docx]

**Appendix A – facial description sentences**

The list of all the sentences used by CLIP to tag the patients’ faces images:

- Reduced facial expression - Non reduced facial expression
- minimal facial expression - maximal facial expression
- little facial expression - large facial expression
- narrow facial expression - extensive facial expression
- Reduced facial muscle movement - Non reduced facial muscle movement
- Reduced emotional expressions - Non reduced emotional expressions
- Reduced expression of sadness - Non reduced expression of sadness
- Reduced expression of surprise - Non reduced expression of surprise
- Reduced expression of happiness - Non reduced expression of happiness
- Reduced facial muscle movement - Non reduced facial muscle movement
- emotional expressions - no emotional expressions
- expression of sadness - no expression of sadness
- expression of surprise - no expression of surprise
- expression of happiness - no expression of happiness
- strange blinks - normal blinks
- Less pronounced facial movements - More pronounced facial movements
- stiff face muscles - Flexible face muscles
- Facial masking - normal facial expressions
- It is hard to crack a smile - It is easy to crack a smile
- It is hard to raise the eyebrow - It is easy to raise the eyebrow
- abnormal mouth function - normal mouth function
- facial asymmetry - facial symmetry
- It is hard to express the feelings using the face - It is easy to express the feelings using the face
- The face is a mask - The face is not a mask
- reptilian stare - non reptilian stare
- lips spread - lips pursed
- stiff facial muscle movement - loose facial muscle movement
- no play of expression - play of expression
- Little play of expression - lots of play of expression
- animates countenance - does not animate countenance
- Impaired facial spontaneous movements - Unimpaired facial spontaneous movements
- Impaired facial emotional movements - unimpaired facial emotional movements
- Abnormal spontaneous smiling - normal spontaneous smiling
- Reduced spontaneous emotion expressiveness - Non reduced spontaneous emotion expressiveness
- Hypomimia of happiness - Not hypomimia of happiness
- Hypomimia of fear - Not hypomimia of fear
- Hypomimia of anger - Not Hypomimia of anger
- Hypomimia of disgust - Not Hypomimia of disgust
- Hypomimia of sadness - Not hypomimia of sadness
- Hypomimia of surprise - Not Hypomimia of surprise
- Hypomimia of neutral - Not Hypomimia of neutral
- Involuntary movements - No involuntary movements
- head shot - not a headshot
